# Supplementary material for: Neutral-pH overall water splitting catalyzed efficiently by a hollow and porous structured ternary nickel sulfoselenide electrocatalyst
Source: Royal Society of Chemistry journal article supplement (doi:10.1039/c9ta05601g), 2019-01-01
Supplement: c9ta05601g1.pdf [file c9ta05601g1.pdf]

# **Neutral-pH Overall Water Splitting Catalyzed Efficiently by a Hollow and Porous Structured Ternary Nickel Sulfoselenide Electrocatalyst**

*Lingyou Zeng, Kaian Sun, Yanju Chen, Zhi Liu, Yinjuan Chen, Yuan Pan,\* Ruiyu Zhao,  
Yunqi Liu\* and Chenguang Liu*

State Key Laboratory of Heavy Oil Processing, Key Laboratory of Catalysis, China University  
of Petroleum (East China), Qingdao, 266580, P. R. China.

Corresponding Author: \*E-mail: panyuan@upc.edu.cn; liuyq-group@upc.edu.cn (Y. L.)

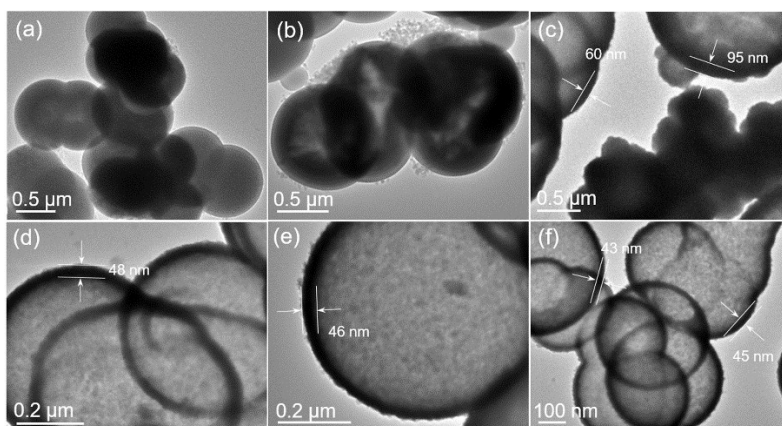

**Figure S1.** TEM images of the time-dependent formation of hollow NiS<sub>2</sub> spheres. (a) 1 h; (b) 2 h; (c) 4 h; (d) 12 h; (e) 24 h; (f) 36 h. The wall thicknesses of hollow spheres were measured and marked in the images. Figure S1 shows that the NiS<sub>2</sub> solid spheres entirely transform into hollow spheres when the hydrothermal time reaches to 12 h. When continue to extend the hydrothermal time from 12 h to 36 h, the wall thicknesses of hollow spheres slightly decrease from 48 nm to 43 nm.

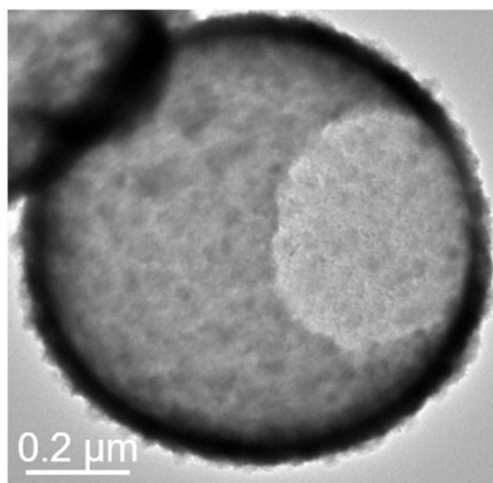

**Figure S2.** TEM image of a typical hollow NiS<sub>2</sub> microsphere with a broken shell.

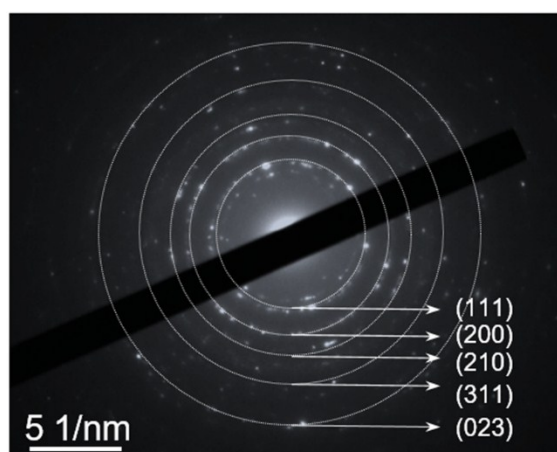

**Figure S3.** The selective area electron diffraction (SAED) pattern of the Ni(S<sub>0.5</sub>Se<sub>0.5</sub>)<sub>2</sub> electrocatalyst.

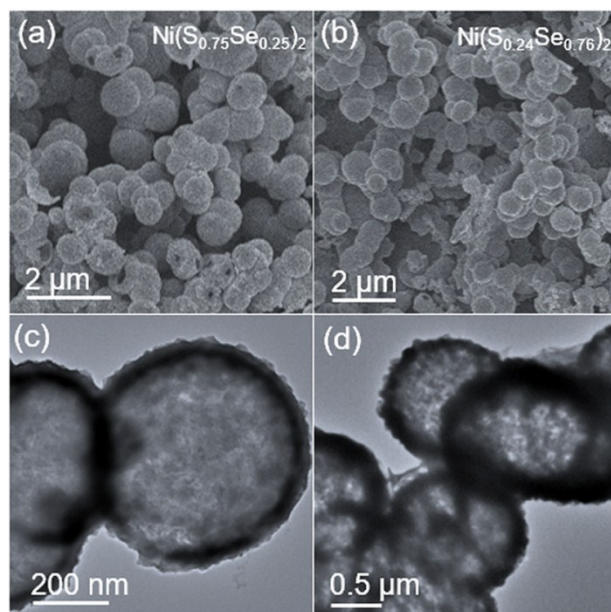

**Figure S4.** (a, b) SEM and (c, d) TEM images of the  $\text{NiS}_{2(1-x)}\text{Se}_{2x}$  porous/hollow spheres with (a, c)  $x = 0.25$  and (b, d)  $x = 0.72$ .

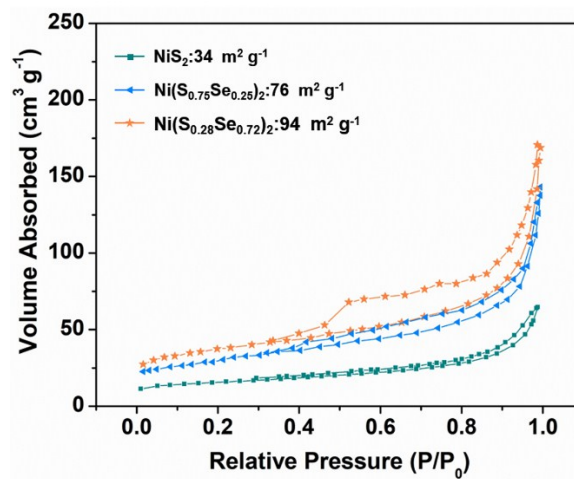

**Figure S5.** Nitrogen sorption isotherms of NiS<sub>2</sub>, Ni(S<sub>0.75</sub>Se<sub>0.25</sub>)<sub>2</sub> and Ni(S<sub>0.28</sub>Se<sub>0.72</sub>)<sub>2</sub> samples.

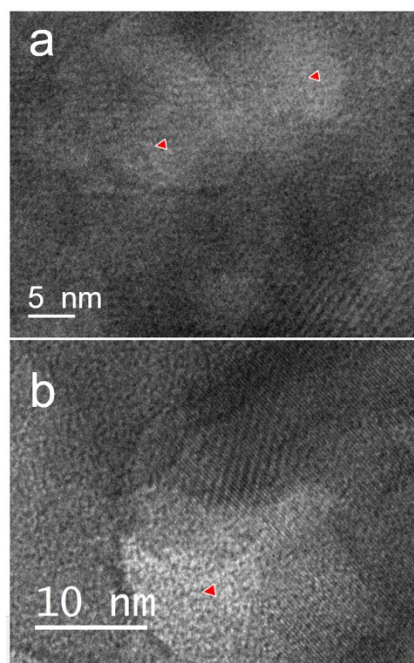

**Figure S6.** HRTEM images of the  $\text{Ni}(\text{S}_{0.5}\text{Se}_{0.5})_2$  catalyst. Red arrows refer to porous structure.

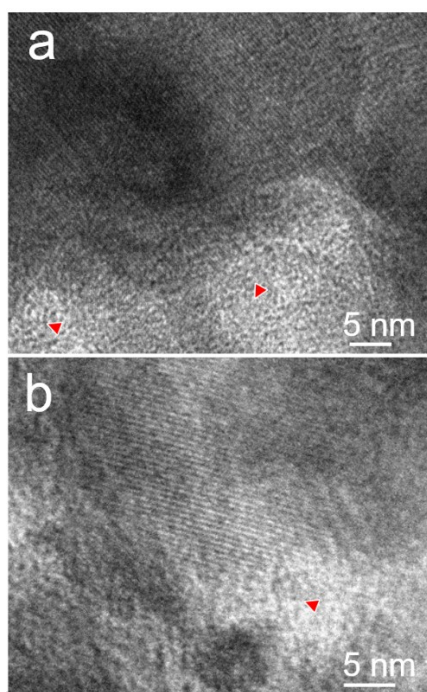

**Figure S7.** HRTEM images of (a)  $\text{Ni}(\text{S}_{0.75}\text{Se}_{0.25})_2$  and (b)  $\text{Ni}(\text{S}_{0.28}\text{Se}_{0.72})_2$  catalysts. Red arrows refer to porous structure.

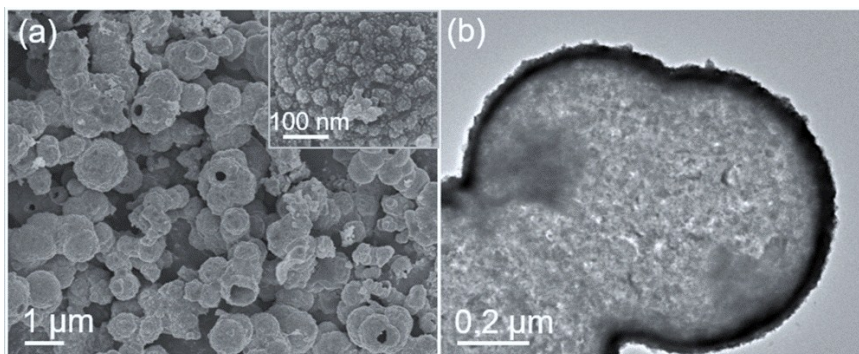

**Figure S8.** SEM images (a) and TEM image (b) for  $\text{Ni}(\text{S}_{0.5}\text{Se}_{0.5})_2$  catalyst after long-term stability test.

**Table S1.** Chemical composition and electrocatalytic performance of the porous/hollow NiS<sub>2</sub>(1-x)Se<sub>2x</sub> catalysts.

|                                                    |                               | NiS <sub>2</sub> | Ni(S <sub>0.75</sub> Se <sub>0.25</sub> ) <sub>2</sub> | Ni(S <sub>0.5</sub> Se <sub>0.5</sub> ) <sub>2</sub> | Ni(S <sub>0.28</sub> Se <sub>0.72</sub> ) <sub>2</sub> |
|----------------------------------------------------|-------------------------------|------------------|--------------------------------------------------------|------------------------------------------------------|--------------------------------------------------------|
| selenization process                               | feed mass ratio <sup>a)</sup> | —                | 1:2                                                    | 1:5                                                  | 1:10                                                   |
|                                                    | reaction time (h)             | —                | 2                                                      | 2                                                    | 5                                                      |
| S:Se ratio from ICP                                |                               | —                | 0.745:0.253                                            | 0.494:0.506                                          | 0.282:0.718                                            |
| $\eta_{10}$ <sup>b)</sup> (mV)                     | HER                           | 245              | 171                                                    | 124                                                  | 141                                                    |
|                                                    | OER                           | 665              | 595                                                    | 501                                                  | 540                                                    |
| Tafel slope (mV dec <sup>-1</sup> )                | HER                           | 106              | 86                                                     | 81                                                   | 92                                                     |
|                                                    | OER                           | 182              | 105                                                    | 94                                                   | 121                                                    |
| C <sub>dl</sub> (mF cm <sup>-2</sup> )             |                               | 4.6              | 8.7                                                    | 12.9                                                 | 9.8                                                    |
| C <sub>dl</sub> -normalized activity <sup>c)</sup> |                               | 0.41             | 0.74                                                   | 1.55                                                 | 1.32                                                   |
| BET surface area (m <sup>2</sup> g <sup>-1</sup> ) |                               | 34               | 76                                                     | 91                                                   | 94                                                     |
| BET-normalized activity <sup>d)</sup>              |                               | 0.04             | 0.09                                                   | 0.22                                                 | 0.13                                                   |

a) feed mass ratio: mass ratio of NiS<sub>2</sub> to Se powder (g/g). b)  $\eta_{10}$ : overpotential requirement for current density of 10 mA cm<sup>-2</sup>. c) and d) : HER current densities at -150 mV vs. RHE normalized to C<sub>dl</sub> and BET surface area, respectively.



**Table S2.** Comparison of the HER performance of Ni(S<sub>0.5</sub>Se<sub>0.5</sub>)<sub>2</sub> with other earth-abundant HER electrocatalysts in neutral electrolyte.

| Catalysts                                            | Support         | Mass loading<br>(mg cm <sup>-2</sup> ) | $\eta$ vs. RHE (mV)<br>@j=10 mA cm <sup>-2</sup> | Tafel slope<br>(mV dec <sup>-1</sup> ) | Electrolyte | Reference |
|------------------------------------------------------|-----------------|----------------------------------------|--------------------------------------------------|----------------------------------------|-------------|-----------|
| Ni(S <sub>0.5</sub> Se <sub>0.5</sub> ) <sub>2</sub> | Ni foam         | 0.75                                   | 124                                              | 81                                     | 1 M PBS     | This work |
| CoP<br>nanowire/CC                                   | Carbon<br>cloth | 0.92                                   | 106                                              | 93                                     | 1 M PBS     | [1]       |
| MoP/CFP                                              | Carbon<br>paper | 2.8                                    | 165                                              | 105                                    | 1 M PBS     | [2]       |
| MoS <sub>2</sub> /Ti plate                           | Ti plate        | 1.5                                    | 200                                              | 152                                    | 1 M PBS     | [3]       |
| FeP NAs                                              | Glass<br>carbon | N.A.                                   | 202                                              | 71                                     | 1 M PBS     | [4]       |
| CoP NS                                               | Ti plate        | 2.0                                    | 149                                              | 58                                     | 1 M PBS     | [5]       |
| Ni <sub>0.1</sub> Co <sub>0.9</sub> P                | Carbon<br>paper | 0.58                                   | 125                                              | 103                                    | 1 M PBS     | [6]       |
| Ni-doped FeP/C                                       | Carbon<br>paper | 0.4                                    | 117                                              | 81                                     | 1 M PBS     | [7]       |
| Amorphous Co-<br>S film                              | FTO             | 1.5                                    | 160                                              | 93                                     | 1 M PBS     | [8]       |
| Co-C-N<br>complex                                    | Glass<br>carbon | 1.25                                   | 107                                              | 273                                    | 1 M PBS     | [9]       |
| CoP-MNA/NF                                           | Ni foam         | 0.92                                   | 189                                              | 180                                    | 0.5 M PBS   | [10]      |
| 3D MoS <sub>2</sub> /N-<br>GAs                       | Glass<br>carbon | 0.7                                    | 261                                              | 230                                    | 1 M PBS     | [11]      |

**Table S3.** Comparison of the OER performance of Ni(S<sub>0.5</sub>Se<sub>0.5</sub>)<sub>2</sub> with other earth-abundant OER electrocatalysts in neutral electrolyte.

| Catalysts                                            | Support         | Mass loading<br>(mg cm <sup>-2</sup> ) | $\eta$ vs. RHE (mV)<br>@j=10 mA cm <sup>-2</sup> | Tafel slope<br>(mV dec <sup>-1</sup> ) | Electrolyte                                       | Ref.      |
|------------------------------------------------------|-----------------|----------------------------------------|--------------------------------------------------|----------------------------------------|---------------------------------------------------|-----------|
| Ni(S <sub>0.5</sub> Se <sub>0.5</sub> ) <sub>2</sub> | Ni foam         | 0.75                                   | 501                                              | 94                                     | 1 M PBS (pH 7)                                    | This work |
| Co <sub>3</sub> S <sub>4</sub> ultrathin nanosheets  | Glassy carbon   | N.A.                                   | 700                                              | 151                                    | PBS (pH 7)                                        | [12]      |
| a-Co <sub>2</sub> P                                  | Glassy carbon   | N.A.                                   | 592                                              | 94.4                                   | 0.1 M PBS                                         | [13]      |
| 1-D CoHCF                                            | Glass substrate | 1.0                                    | 880                                              | N.A.                                   | PBS (pH 7)                                        | [14]      |
| Co-Bi NS/G                                           | Glass carbon    | 0.285                                  | 570 mV @ 14.4                                    | 160                                    | PBS (pH 7)                                        | [15]      |
| Bi <sub>2</sub> WO <sub>6</sub> CNPs                 | Glass carbon    | 0.34                                   | 540                                              | N.A.                                   | 0.5 M Na <sub>2</sub> SO <sub>4</sub><br>(pH 6.6) | [16]      |
| CuCo <sub>2</sub> O <sub>4</sub> /NrGO               | Glass carbon    | 0.8                                    | 540                                              | 79                                     | 0.1 M PBS (pH 7.6)                                | [17]      |

N.A. stands for not given.

**Table S4.** Comparison of recent bifunctional electrocatalysts for overall water splitting in neutral electrolytes.

| Catalysts                                            | Support      | Mass loading<br>(mg cm <sup>-2</sup> ) | Electrolyte       | HER $\eta_{10}$<br>(mV) | HER Tafel slope<br>(mV dec <sup>-1</sup> ) | OER $\eta_{10}$<br>(mV) | OER Tafel slope<br>(mV dec <sup>-1</sup> ) | E <sub>10</sub><br>(V) | Ref.      |
|------------------------------------------------------|--------------|----------------------------------------|-------------------|-------------------------|--------------------------------------------|-------------------------|--------------------------------------------|------------------------|-----------|
| Ni(S <sub>0.5</sub> Se <sub>0.5</sub> ) <sub>2</sub> | Ni foam      | 0.75                                   | 1 M PBS<br>(pH 7) | 124                     | 81                                         | 501                     | 94                                         | 1.87                   | This work |
| S-NiFe <sub>2</sub> O <sub>4</sub>                   | Ni foam      | N.A.                                   | 1 M PBS<br>(pH 7) | 197                     | 81.3                                       | 494                     | 118.1                                      | 1.95                   | [18]      |
| CoO/CoSe <sub>2</sub> -Ti                            | Ti mesh      | 2.0                                    | 0.5 M PBS         | 337                     | 131                                        | 510                     | 137                                        | 2.18                   | [19]      |
| Ni <sub>0.1</sub> Co <sub>0.9</sub> P                | Carbon paper | 0.58                                   | 1 M PBS<br>(pH 7) | 125                     | 103                                        | 570                     | 133                                        | 1.89                   | [6]       |

N.A. stands for not given.

## References

- [1] J. Tian, Q. Liu, A. M. Asiri, X. Sun, *J. Am. Chem. Soc.* **2014**, 136, 7587.
- [2] X. Zhang, F. Zhou, W. Pan, Y. Liang, R. Wang, *Adv. Funct. Mater.* **2018**, 28, 1804600.
- [3] J. Shi, J. Hu, *Electrochim. Acta* **2015**, 168, 256.
- [4] Y. Liang, Q. Liu, A. M. Asiri, X. Sun, Y. Luo, *J. Am. Chem. Soc.* **2013**, 135, 17699.
- [5] Z. Pu, Q. Liu, P. Jiang, A. M. Asiri, A. Y. Obaid, X. Sun, *Chem. Mater.* **2014**, 26, 4326.
- [6] R. Wu, B. Xiao, Q. Gao, Y.-R. Zheng, X.-S. Zheng, J.-F. Zhu, *Angew. Chem. Int. Ed.* **2018**, 57, 15445.
- [7] F. L. Xue, L. Yu, X. W. D. Lou, *Sci. Adv.* **2019**, 5, eaav6009.
- [8] Y. Sun, C. Liu, D. C. Grauer, J. Yano, J. R. Long, P. Yang, C. J. Chang, *J. Am. Chem. Soc.* **2013**, 135, 17699.
- [9] Z.-L. Wang, X.-F. Hao, Z. Jiang, X.-P. Sun, D. Xu, J. Wang, H.-X. Zhong, F.-L. Meng, X.-B. Zhang, *J. Am. Chem. Soc.* **2015**, 137, 15070.
- [10] Y. P. Zhu, Y. P. Liu, T. Z. Ren, Z. Y. Yuan, *Adv. Funct. Mater.* **2015**, 25, 7337.
- [11] Y. Hou, B. Zhang, Z. Wen, S. Cui, X. Guo, Z. He, J. Chen, *J. Mater. Chem. A* **2014**, 2, 13795.
- [12] Y. Liu, C. Xiao, M. Lyu, Y. Lin, W. Cai, P. Huang, W. Tong, Y. Zou, Y. Xie, *Angew Chem. Int. Ed.* **2015**, 54, 11231.
- [13] K. Xu, H. Cheng, L. Liu, H. Lv, X. Wu, C. Wu, Y. Xie, *Nano Lett.* **2017**, 17, 578.
- [14] H. T. Bui, N. K. Shrestha, M. M. Sung, J. K. Lee, S.-H. Han, *J. Mater. Chem. A* **2016**, 4, 9781.
- [15] P. Chen, K. Xu, T. Zhou, Y. Tong, J. Wu, H. Cheng, X. Lu, H. Ding, C. Wu, Y. Xie, *Angew. Chem. Int. Ed.* **2016**, 55, 2488.
- [16] Z.-P. Nie, D.-K. Ma, G.-Y. Fang, W. Chen, S.-M. Huang, *J. Mater. Chem. A* **2016**, 4, 2438.
- [17] L. Xie, R. Zhang, L. Cui, D. Liu, S. Hao, Y. Ma, G. Du, A. M. Asiri, X. Sun, *Angew. Chem. Int. Ed.* **2017**, 56, 1064.
- [18] J. Liu, D. Zhu, T. Ling, A. Vasileff, S.-Z. Qiao, *Nano Energy* **2017**, 40, 264.
- [19] K. Li, J. Zhang, R. Wu, Y. Yu, B. Zhang, *Adv. Sci.* **2016**, 3, 1500426.
